# Supplementary material
Source: PubMed Central journal article supplement (PMC7015079)
Supplement: CJN.06710619SupplementaryData.pdf [file CJN.06710619SupplementaryData.pdf]

## Supplemental Material

*Supplemental material is neither peer-reviewed nor thoroughly edited by CJASN. The authors alone are responsible for the accuracy and presentation of the material.*

### **Mediterranean Style Diet and Kidney Function Loss in Kidney Transplant Recipients**

António W. Gomes-Neto MD<sup>1</sup>, Maryse C.J. Osté MD<sup>1</sup>, Camilo G. Sotomayor MD<sup>1</sup>, Else v.d. Berg MD-PhD<sup>1</sup>, Johanna. M. Geleijnse PhD<sup>2</sup>, Stefan P. Berger MD-PhD<sup>1</sup>, Reinold O.B. Gans MD-PhD<sup>1</sup>, Stephan J.L. Bakker MD-PhD<sup>1</sup>, Gerjan J. Navis MD-PhD<sup>1</sup>

<sup>1</sup>Department of Internal Medicine, University Medical Center Groningen, University of Groningen, Groningen, the Netherlands.

<sup>2</sup>Division of Human Nutrition, Wageningen University, Wageningen, the Netherlands.

#### **Supplemental Material Table of Contents**

**Supplemental Table 1:** Overview of food items used to determine the Mediterranean Diet Score.

**Supplemental Table 2.** Association per component of the Mediterranean Diet Score on Graft Failure, Kidney Function Decline and Graft Loss.

**Supplemental Table 3.** Overview of food items used to determine the adapted Mediterranean Diet Score by Fung, *et al.*

**Supplemental Table 4.** Association of the Adapted Mediterranean Diet Score by Fung, *et al.* on Graft Failure, Kidney Function Decline and Graft Loss.

**Supplemental Table 5.** Association of the Mediterranean Diet Score on All-Cause Mortality.

**Supplemental Table 6.** Competing Risk analyses of the Mediterranean Diet Score on Graft Failure and Kidney Function Decline, considering death as a competing event.

#### **Corresponding author**

A.W. Gomes Neto, MD, PhD-candidate,

Department of Internal Medicine, Division of Nephrology

University Medical Center Groningen

Hanzeplein 1, P.O. Box 30.001, 9700 RB Groningen, the Netherlands

Phone: 0031 50 361 15 64

E-mail: [a.w.gomes.neto@umcg.nl](mailto:a.w.gomes.neto@umcg.nl)

Supplemental Material

*Supplemental material is neither peer-reviewed nor thoroughly edited by CJASN. The authors alone are responsible for the accuracy and presentation of the material.*

**Supplemental Table 1.** Overview of food items used to determine the Mediterranean Diet Score.

|   | <b>Food group</b>                            | <b>Food items</b>                                                                                                                                                                                                                                                                                                                                                                                                                                                                                                                                                                                                                                                                                        |
|---|----------------------------------------------|----------------------------------------------------------------------------------------------------------------------------------------------------------------------------------------------------------------------------------------------------------------------------------------------------------------------------------------------------------------------------------------------------------------------------------------------------------------------------------------------------------------------------------------------------------------------------------------------------------------------------------------------------------------------------------------------------------|
| 1 | Ratio mono-unsaturated:saturated fatty acids | -                                                                                                                                                                                                                                                                                                                                                                                                                                                                                                                                                                                                                                                                                                        |
| 2 | Legumes, nuts and soy products               | Legumes, soy products, peanuts (and coated peanuts), nuts                                                                                                                                                                                                                                                                                                                                                                                                                                                                                                                                                                                                                                                |
| 3 | Cereals                                      | Rusk, croissants, bread rolls, cereals, pasta, rice, bread, rye bread, raisin bread                                                                                                                                                                                                                                                                                                                                                                                                                                                                                                                                                                                                                      |
| 4 | Fruit                                        | Citrus fruit, other fresh fruit, canned fruit                                                                                                                                                                                                                                                                                                                                                                                                                                                                                                                                                                                                                                                            |
| 5 | Vegetables                                   | Green legumes, cruciferous vegetables, green-leafy vegetables, mushrooms, onion, peppers, vegetable juices                                                                                                                                                                                                                                                                                                                                                                                                                                                                                                                                                                                               |
| 6 | Meat products                                | Chicken, turkey, beef steak, beef blind finch, pork steak, pork chop, pork sausage, lamb or mutton, other meat, organ meat, sausage, minced meat, liver products, ham, luncheon meat, bacon.                                                                                                                                                                                                                                                                                                                                                                                                                                                                                                             |
| 7 | Dairy products                               | Full milk, semi-skimmed milk, skimmed milk, buttermilk, other milk, 20+/30+ cheese, 40+ cheese, 48+ cheese, luxury fat cheese, less fat cheese, cheese used in hot meal, cheese as in between snack, full (fruit) yoghurt, yoghurt with probiotics, full custard and pudding, lean custard and pudding, full (fruit) cream cheese, semi-skimmed (fruit) cream cheese, ice cream, whipped cream, unknown type dairy drink, porridge, normal milk in coffee, coffee milk, coffee cream, cream used in hot meals, full fat milk beverages, semi-skimmed fat milk beverages, skimmed milk beverages, breakfast drink, butter, low-fat butter, beverages with probiotics, cholesterol-lowering yoghurt drinks |
| 8 | Fish                                         | Shellfish, trout, mullet, plaice, other lean fish, salmon and other fatty fish, herring, fried fish, unknown fish species                                                                                                                                                                                                                                                                                                                                                                                                                                                                                                                                                                                |
| 9 | Alcohol                                      | Beer, wine, cocktails, spirits                                                                                                                                                                                                                                                                                                                                                                                                                                                                                                                                                                                                                                                                           |

Supplemental Material

Supplemental material is neither peer-reviewed nor thoroughly edited by CJASN. The authors alone are responsible for the accuracy and presentation of the material.

**Supplemental Table 2.** Association per component of the Mediterranean Diet Score on Graft Failure, Kidney Function Decline and Graft Loss.

| Components                                   | Median (IQR) intake | Graft Failure                |                              | Renal Function Decline       |                              | Graft Loss                   |                              |
|----------------------------------------------|---------------------|------------------------------|------------------------------|------------------------------|------------------------------|------------------------------|------------------------------|
|                                              |                     | < sex-specific median intake |
|                                              |                     | HR (95%CI)                   |
| Ratio monounsaturated: saturated fatty acids | 0.95 (0.84-1.07)    | reference                    | 0.70 (0.44-1.10)             | reference                    | 0.91 (0.64-1.30)             | reference                    | 0.82 (0.61-1.10)             |
| Legumes and nuts                             | 37 (23-58) g/d      | reference                    | 0.57 (0.36-0.91)             | reference                    | 0.71 (0.49-1.02)             | reference                    | 0.85 (0.63-1.13)             |
| Cereals                                      | 175 (130-225) g/d   | reference                    | 1.13 (0.72-1.78)             | reference                    | 0.85 (0.59-1.21)             | reference                    | 0.66 (0.49-0.89)             |
| Fruit                                        | 123 (66-232) g/d    | reference                    | 0.86 (0.55-1.35)             | reference                    | 1.10 (0.77-1.59)             | reference                    | 0.76 (0.56-1.01)             |
| Vegetables                                   | 82 (54-123) g/d     | reference                    | 0.77 (0.49-1.20)             | reference                    | 0.94 (0.66-1.35)             | reference                    | 1.01 (0.75-1.35)             |
| Fish                                         | 11 (4-20) g/d       | reference                    | 0.81 (0.52-1.27)             | reference                    | 0.87 (0.61-1.25)             | reference                    | 0.94 (0.71-1.26)             |
| Meat products                                | 93 (7-117) g/d      | 1.23 (0.79-1.96)             | reference                    | 1.10 (0.77-1.59)             | reference                    | 1.05 (0.79-1.41)             | reference                    |
| Dairy products                               | 362 (233-507) g/d   | 0.82 (0.52-1.29)             | reference                    | 0.94 (0.66-1.35)             | reference                    | 0.92 (0.69-1.23)             | reference                    |
| Components                                   | Median (IQR) intake | No moderate intake           | Moderate intake              | No moderate intake           | Moderate intake              | No moderate intake           | Moderate intake              |
|                                              |                     | HR (95%CI)                   |
| Alcohol†                                     | 2.6 (0-11.1) g/d    | reference                    | 0.69 (0.41-1.17)             | reference                    | 0.61 (0.40-0.95)             | reference                    | 0.63 (0.44-0.89)             |

## Supplemental Material

Supplemental material is neither peer-reviewed nor thoroughly edited by CJASN. The authors alone are responsible for the accuracy and presentation of the material.

**Supplemental Table 3.** Overview of food items used to determine the adapted Mediterranean Diet Score by Fung, *et al.*

|   | <b>Food group</b>                            | <b>Food items</b>                                                                                                         |
|---|----------------------------------------------|---------------------------------------------------------------------------------------------------------------------------|
| 1 | Ratio mono-unsaturated:saturated fatty acids | -                                                                                                                         |
| 2 | Legumes and soy products                     | Legumes, soy products, peanuts (and coated peanuts)                                                                       |
| 3 | Nuts                                         | Nuts                                                                                                                      |
| 4 | Whole grains                                 | Bread, rye bread                                                                                                          |
| 5 | Fruit                                        | Citrus fruit, other fresh fruit, canned fruit                                                                             |
| 6 | Vegetables                                   | Green legumes, cruciferous vegetables, green-leafy vegetables, mushrooms, onion, peppers, vegetable juices                |
| 7 | Red processed meat                           | Beef, blind finch, pork steak, pork chop, pork sausage, sausage, minced meat, liver products, ham, luncheon meat, bacon.  |
| 8 | Fish                                         | Shellfish, trout, mullet, plaice, other lean fish, salmon and other fatty fish, herring, fried fish, unknown fish species |
| 9 | Alcohol                                      | Beer, wine, cocktails, spirits                                                                                            |

### **Description of the Adapted Mediterranean Diet Score.**

The Adapted Mediterranean Score is an adaptation of the traditional Mediterranean Diet Score to measure adherence to a Mediterranean-style diet in the US population. Based on the sex-specific median intake, subjects were assigned either 1 or 0 points per food component. For higher consumption of fruits, vegetables, nuts, legumes, whole grains, fish, and mono-unsaturated to saturated fatty acids ratio, moderate consumption of alcohol, and lower consumption of red/processed meat a score of 1 was assigned.

Supplemental Material

Supplemental material is neither peer-reviewed nor thoroughly edited by CJASN. The authors alone are responsible for the accuracy and presentation of the material.

**Supplemental Table 4.** Association of the Adapted Mediterranean Diet Score by Fung, *et al.* on Graft Failure, Kidney Function Decline and Graft Loss.

|                       | Primary End Point     |      | Secondary End Points    |       |                       |         |
|-----------------------|-----------------------|------|-------------------------|-------|-----------------------|---------|
|                       | Graft Failure         |      | Kidney Function Decline |       | Graft Loss            |         |
| N <sup>0</sup> Events | 73                    |      | 119                     |       | 181                   |         |
|                       | Hazard Ratio (95% CI) | P    | Hazard Ratio (95% CI)   | P     | Hazard Ratio (95% CI) | P       |
| Crude                 | 0.76 (0.59-0.99)      | 0.04 | 0.73 (0.60-0.90)        | 0.003 | 0.79 (0.67-0.94)      | 0.006   |
| Model 1               | 0.79 (0.61-1.03)      | 0.08 | 0.74 (0.60-0.91)        | 0.004 | 0.76 (0.64-0.89)      | 0.001   |
| Model 2               | 0.78 (0.58-1.04)      | 0.09 | 0.69 (0.55-0.87)        | 0.001 | 0.72 (0.60-0.86)      | < 0.001 |
| Model 3               | 0.76 (0.56-1.02)      | 0.07 | 0.69 (0.55-0.87)        | 0.002 | 0.74 (0.62-0.88)      | 0.001   |
| Model 4               | 0.75 (0.55-1.01)      | 0.06 | 0.68 (0.54-0.86)        | 0.001 | 0.72 (0.60-0.87)      | < 0.001 |
| Model 5               | 0.75 (0.56-1.01)      | 0.06 | 0.70 (0.56-0.88)        | 0.003 | 0.73 (0.61-0.87)      | 0.001   |
| Model 6               | 0.74 (0.54-1.00)      | 0.05 | 0.68 (0.54-0.87)        | 0.002 | 0.71 (0.59-0.85)      | < 0.001 |
| Model 7               | 0.77 (0.57-1.05)      | 0.10 | 0.71 (0.56-0.90)        | 0.004 | 0.73 (0.61-0.88)      | 0.001   |

Model 1: Mediterranean Diet Score , age, sex, body surface area

Model 2: model 1 + primary renal disease, eGFR, 24-hr protein excretion, time since transplantation.

Model 3: model 2 + total HLA-mismatches, living donor kidney status, pre-emptive transplantation.

Model 4: model 3 + history of acute rejection, cytomegalovirus infection, hepatitis-C status.

Model 5: model 3 + calcineurin-inhibitor use, proliferation-inhibitor use, prednisolone use.

Model 6: model 3 + diabetes, systolic blood pressure, cardiovascular history, ACE-inhibitor, Angiotensin-II-receptor blocker, and thiazide diuretic.

Model 7: model 3 + smoking status, physical activity (SQUASH-score), energy intake, protein intake and weight gain 1 year after baseline.

Supplemental Material

Supplemental material is neither peer-reviewed nor thoroughly edited by CJASN. The authors alone are responsible for the accuracy and presentation of the material.

**Supplemental Table 5.** Association of the Mediterranean Diet Score on All-Cause Mortality.

| All-Cause Mortality   |                       |         |
|-----------------------|-----------------------|---------|
| N <sup>0</sup> Events | 129                   |         |
|                       | Hazard Ratio (95% CI) | P-value |
| Crude                 | 0.81 (0.67-0.99)      | 0.04    |
| Model 1               | 0.80 (0.66-0.97)      | 0.03    |
| Model 2               | 0.81 (0.66-0.98)      | 0.03    |
| Model 3               | 0.84 (0.69-1.02)      | 0.08    |
| Model 4               | 0.83 (0.68-1.02)      | 0.07    |
| Model 5               | 0.86 (0.70-1.05)      | 0.13    |
| Model 6               | 0.83 (0.67-1.02)      | 0.08    |
| Model 7               | 0.83 (0.68-1.03)      | 0.09    |

Model 1: Mediterranean Diet Score , age, sex, body surface area

Model 2: model 1 + primary renal disease, eGFR, 24-hr protein excretion, time since transplantation.

Model 3: model 2 + total HLA-mismatches, living donor kidney status, pre-emptive transplantation.

Model 4: model 3 + history of acute rejection, cytomegalovirus infection, hepatitis-C status.

Model 5: model 3 + calcineurin-inhibitor use, proliferation-inhibitor use, prednisolone use.

Model 6: model 3 + diabetes, systolic blood pressure, cardiovascular history, ACE-inhibitor, Angiotensin-II-receptor blocker, and thiazide diuretic.

Model 7: model 3 + smoking status, physical activity (SQUASH-score), energy intake, protein intake and weight gain 1 year after baseline.

Supplemental Material

Supplemental material is neither peer-reviewed nor thoroughly edited by CJASN. The authors alone are responsible for the accuracy and presentation of the material.

**Supplemental Table 6.** Competing Risk analyses of the Mediterranean Diet Score on Graft Failure and Kidney Function Decline, considering death as a competing event.

| N <sup>0</sup> Events | Graft failure    |          | Kidney Function Decline |          |
|-----------------------|------------------|----------|-------------------------|----------|
|                       | HR (95% CI)      | <i>P</i> | HR (95% CI)             | <i>P</i> |
|                       | 73               |          | 119                     |          |
| Crude                 | 0.76 (0.59-0.99) | 0.04     | 0.77 (0.63-0.93)        | 0.007    |
| Model 1               | 0.77 (0.59-0.99) | 0.05     | 0.76 (0.63-0.93)        | 0.008    |
| Model 2               | 0.73 (0.54-0.99) | 0.04     | 0.68 (0.55-0.84)        | 0.001    |
| Model 3               | 0.73 (0.54-0.99) | 0.04     | 0.69 (0.56-0.86)        | 0.001    |
| Model 4               | 0.73 (0.54-0.99) | 0.04     | 0.68 (0.55-0.86)        | 0.001    |
| Model 5               | 0.73 (0.54-0.99) | 0.04     | 0.70 (0.56-0.87)        | 0.001    |
| Model 6               | 0.69 (0.51-0.95) | 0.02     | 0.72 (0.57-0.90)        | 0.005    |
| Model 7               | 0.74 (0.54-1.00) | 0.05     | 0.71 (0.57-0.89)        | 0.003    |

Model 1: Mediterranean Diet Score , age, sex, body surface area

Model 2: model 1 + primary renal disease, eGFR, 24-hr protein excretion, time since transplantation.

Model 3: model 2 + total HLA-mismatches, living donor kidney status, pre-emptive transplantation.

Model 4: model 3 + history of acute rejection, cytomegalovirus infection, hepatitis-C status.

Model 5: model 3 + calcineurin-inhibitor use, proliferation-inhibitor use, prednisolone use.

Model 6: model 3 + diabetes, systolic blood pressure, cardiovascular history, ACE-inhibitor, Angiotensin-II-receptor blocker, and thiazide diuretic.

Model 7: model 3 + smoking status, physical activity (SQUASH-score), energy intake, protein intake and weight gain 1 year after baseline.
